# Supplementary material
Source: PubMed Central journal article supplement (PMC7855310)
Supplement: NIHMS1642835-supplement-1.pdf [file NIHMS1642835-supplement-1.pdf]

## Supplementary Figure 1

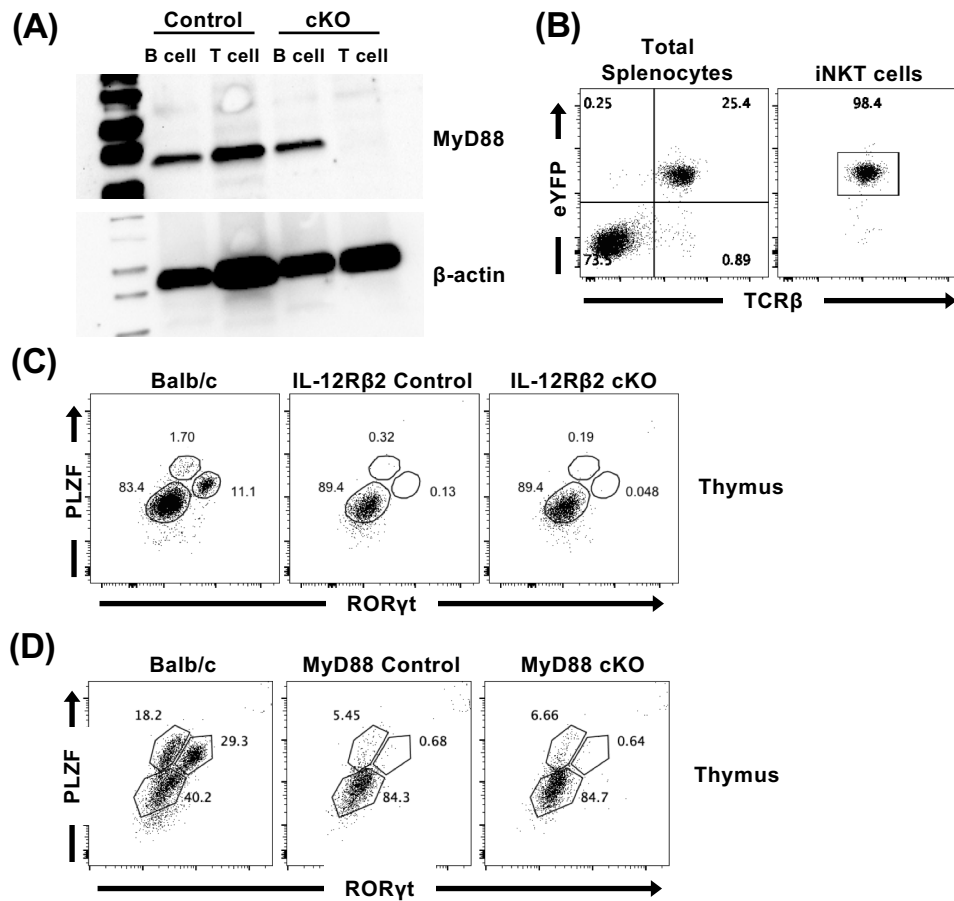

**Supplementary Figure 1. IL-12R $\beta$ 2 and MyD88 signaling are dispensable for naïve NKT cell lineages.** (A) MyD88 and  $\beta$ -actin protein expression were determined via Western Blot using T cells (CD19<sup>-</sup>TCR $\beta$ <sup>+</sup>eYFP<sup>+</sup>) and B cells (CD19<sup>+</sup>TCR $\beta$ <sup>-</sup>) sorted from the spleen of MyD88 control and cKO animals. (B) Representative eYFP expression of total splenocytes and iNKT cells (TCR $\beta$ <sup>+</sup>CD1d<sup>+</sup>) from MyD88 cKO animals. (C) Representative staining of NKT1, NKT2, and NKT17 lineages (TCR $\beta$ <sup>+</sup>CD1d<sup>+</sup>) from the thymus of IL-12R $\beta$ 2 control and cKO mice, compared to BALB/c control. (D) Representative staining of NKT1, NKT2, and NKT17 lineages (TCR $\beta$ <sup>+</sup>CD1d<sup>+</sup>) from the thymus of MyD88 control and cKO mice, compared to BALB/c control. Data are representative of two (A) or at least three (B-D) independent experiments and error bars indicate SEM.

## Supplementary Figure 2

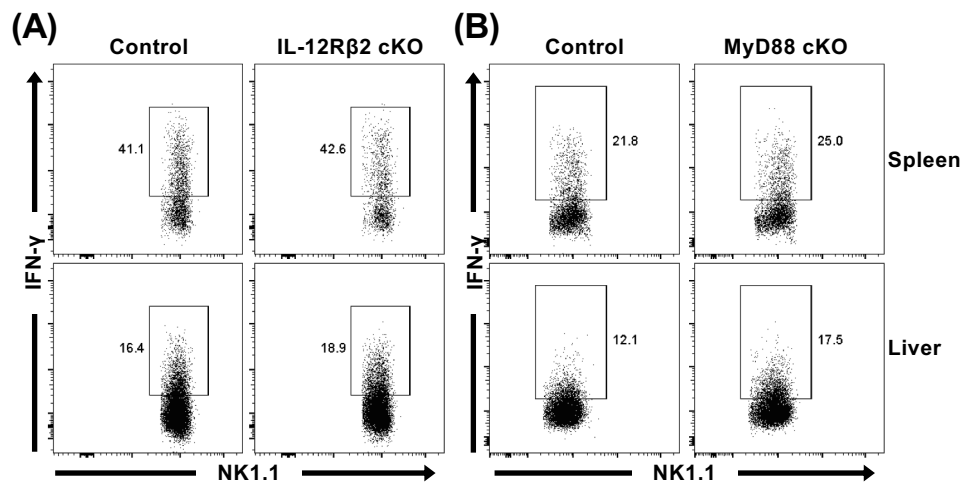

**Supplementary Figure 2. Loss of IL-12R $\beta$ 2 and MyD88 signaling in the T cell lineage differentially affect iNKT cell activation following MCMV infection, but not NK cells.** Representative flow cytometry of IFN- $\gamma$ <sup>+</sup> NK cells (TCR $\beta$ <sup>-</sup>NK1.1<sup>+</sup>) from the spleen and liver of (A) IL-12R $\beta$ 2 control and cKO mice or (B) MyD88 control and cKO mice at 36 hours post-infection with MCMV. Data are representative of two (A) or three (B) independent experiments.

### Supplementary Figure 3

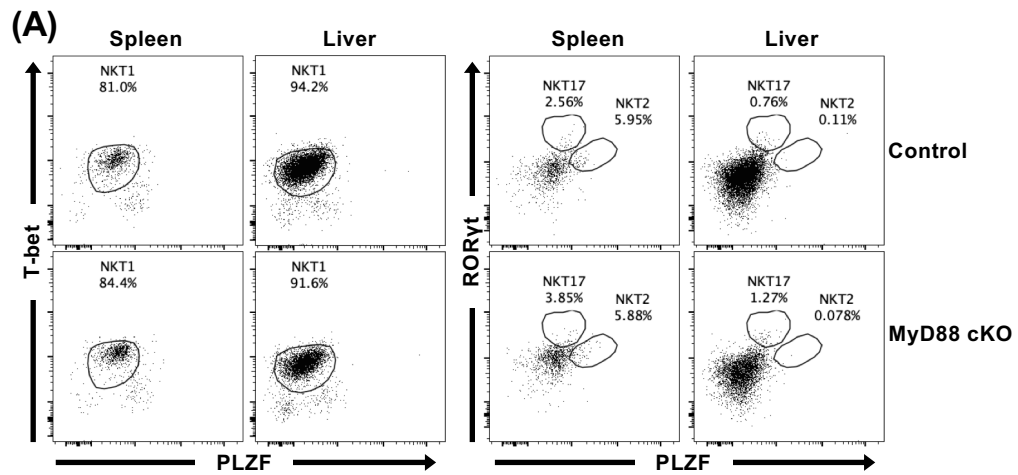

**Supplementary Figure 3. NKT1 cells are not detrimentally affected by loss of MyD88 signaling during acute MCMV infection.** (A) Representative flow cytometry of NKT1, NKT2, and NKT17 cells ( $CD45^+TCR\beta^+CD1d^{tet+}$ ) in the spleen and liver of MyD88 control and MyD88 cKO animals at 36 hours post-infection with MCMV. NKT cells lineages were differentiated using PLZF, ROR $\gamma$ t, and T-bet expression. Data are representative of two independent experiments.
